# Supplementary material
Source: Springer Nature journal article supplement (https://www.springermedizin.de/resource/supplementary/13058_2010_9477_MOESM5_ESM.PDF/9702238)
Supplement: MOESM5 [file 9702238]

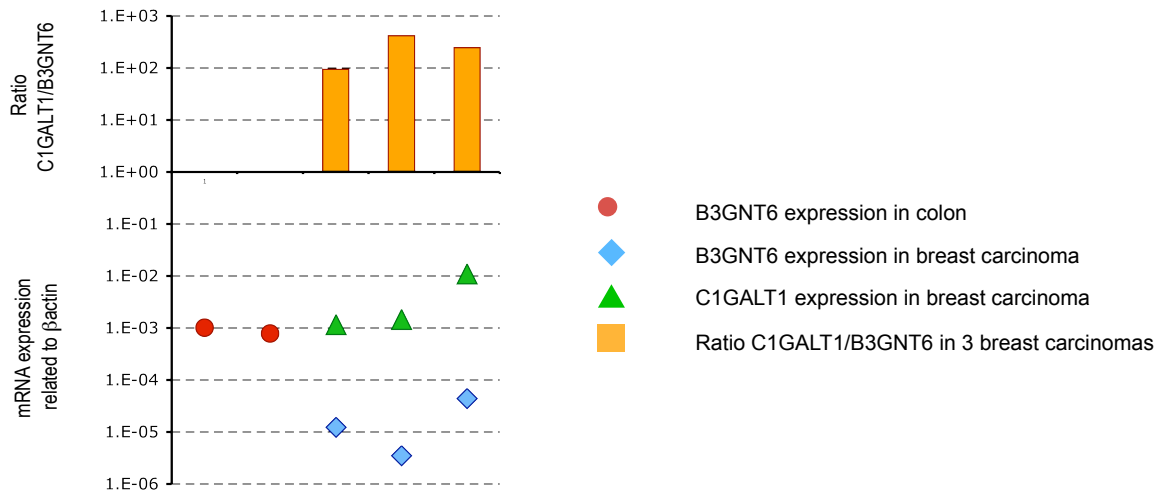

**Supplementary figure 4: Expression of B3GNT6 in breast cancers. B3GNT6 transcript could only be detected in 3 of the 58 breast carcinomas analysed.**
